# Supplementary material for: Multiple magnetic relaxation processes, magnetocaloric effect and fluorescence properties of rhombus-shaped tetranuclear rare earth complexes
Source: Royal Society of Chemistry journal article supplement (doi:10.1039/c5dt03790e), 2015-11-11
Supplement: c5dt03790e1.pdf [file c5dt03790e1.pdf]

## Electronic Supplementary Information

Multiple magnetic relaxation processes, magnetocaloric effect and fluorescent properties of rhombus-shaped tetranuclear rare earth complexes

Hong-Ling Gao, Li Jiang, Shuang Liu, Hai-Yun Shen, Wen-Min Wang and Jian-Zhong Cui\*<sup>1</sup>

*Department of Chemistry, Tianjin University, Tianjin 300072, People's Republic of China*

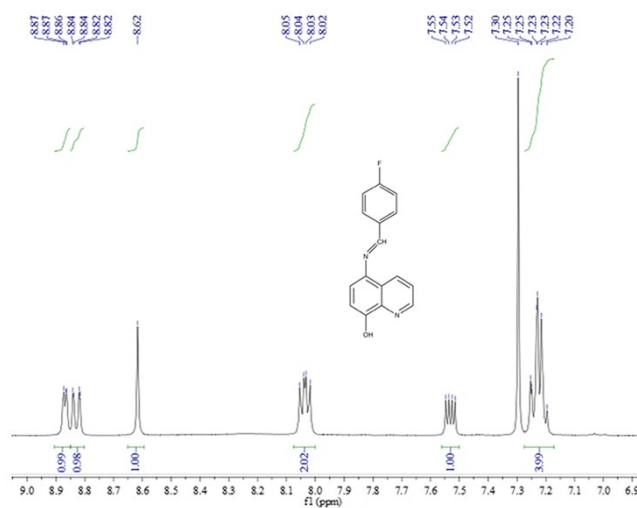

**Fig. S1** The <sup>1</sup>H NMR spectrum of 5-(4-fluorobenzylidene)-8-hydroxyquinoline.

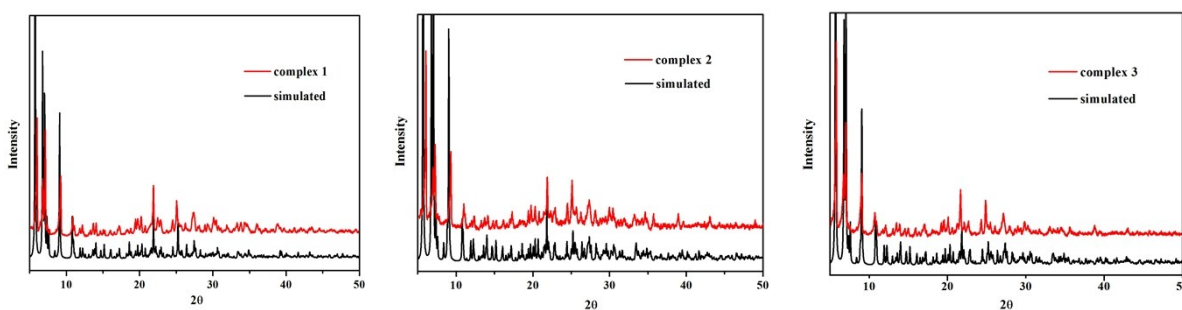

<sup>1</sup> Corresponding author. *E-mail:* cuijianzhong@tju.edu.cn (J.-Z. Cui).

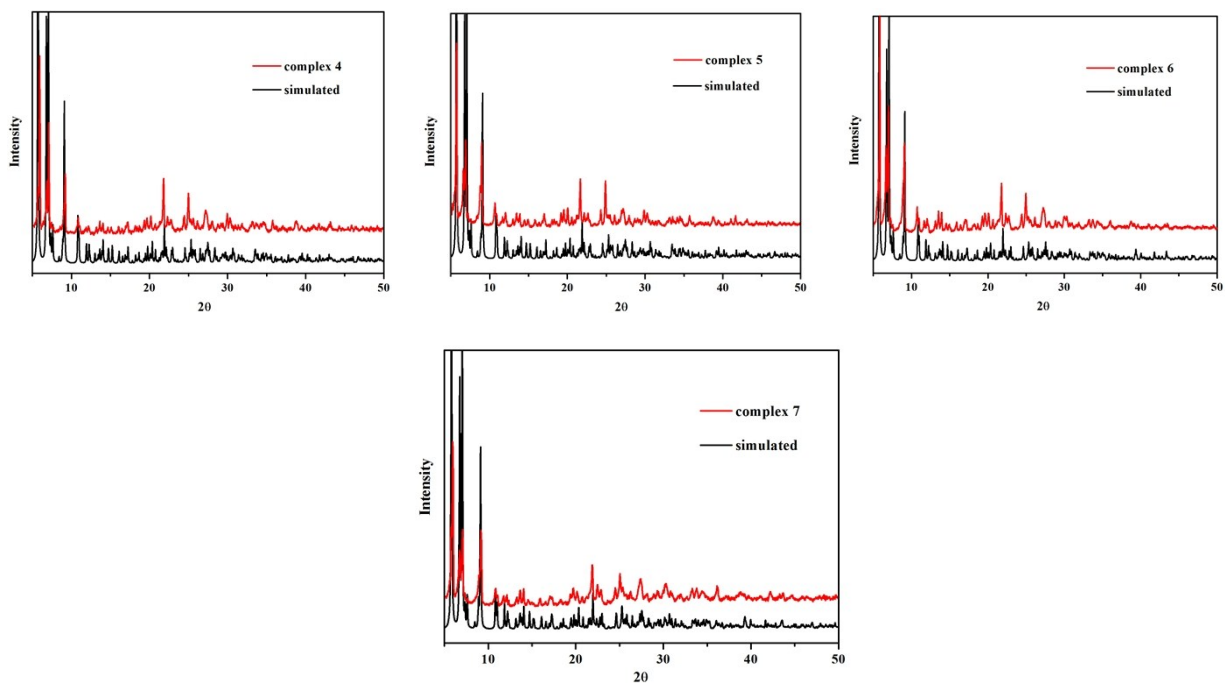

**Fig. S2** The experimental and simulated PXRD patterns of complexes 1–7.

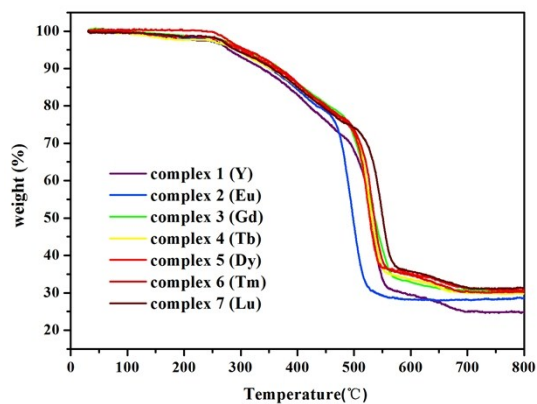

**Fig. S3** TG curves of complexes 1–7.

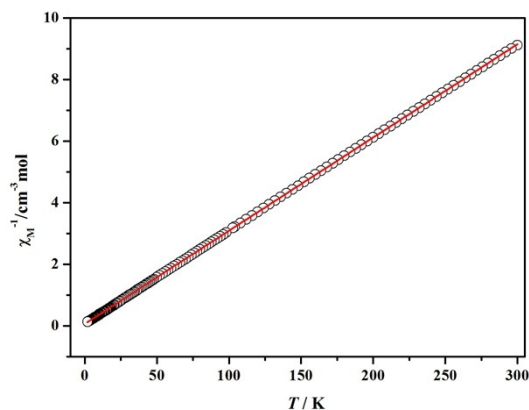

**Fig. S4** The inverse magnetic susceptibility,  $1/\chi_M$ , at 2–300K with a *dc* field of 1000 Oe for complex **3**. The red solid line represents the least square fit for the Curie-Weiss law, giving a  $\theta = -2.15$  K.

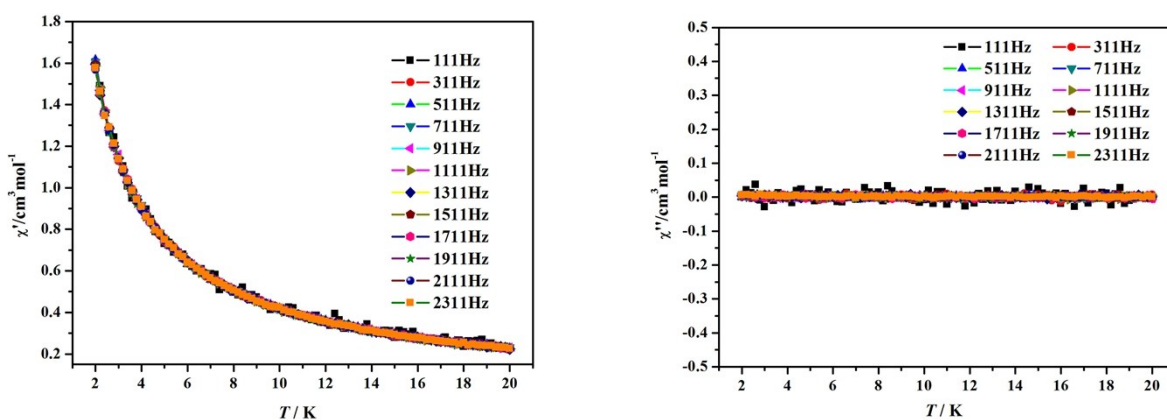

**Fig. S5** Temperature dependence of the *ac* susceptibility for complex **4** as a function of the temperature below 20 K under an oscillating *ac* field of 3 Oe.

**Table S1** Selected bond lengths and angles for complexes **1–7**.

| Complex <b>1</b> |          |           |          |
|------------------|----------|-----------|----------|
| Y(1)–O(8)        | 2.291(3) | Y(2)–O(7) | 2.289(3) |
| Y(1)–O(4)        | 2.294(3) | Y(2)–O(8) | 2.306(3) |
| Y(1)–O(5)        | 2.303(3) | Y(2)–O(6) | 2.307(3) |
| Y(1)–O(3)#1      | 2.366(3) | Y(2)–O(2) | 2.319(3) |
| Y(1)–O(1)        | 2.373(3) | Y(2)–O(3) | 2.388(3) |
| Y(1)–O(8) #1     | 2.377(3) | Y(2)–O(1) | 2.394(3) |
| Y(1)–O(2) #1     | 2.426(3) | Y(2)–N(3) | 2.488(3) |

|                   |            |                   |            |
|-------------------|------------|-------------------|------------|
| Y(1)–N(1)         | 2.522(3)   | Y(2)–N(5)         | 2.544(4)   |
| O(8)–Y(1)–O(1)    | 70.16(9)   | O(8)#1–Y(1)–N(1)  | 74.80(10)  |
| O(5)–Y(1)–O(3)#1  | 82.06(10)  | O(4)–Y(1)–O(2)#1  | 76.28(10)  |
| O(6)–Y(2)–O(1)    | 109.40(10) | O(7)–Y(2)–O(8)    | 129.11(10) |
| O(2)–Y(2)–N(5)    | 108.59(11) | O(3)–Y(2)–N(3)    | 111.96(11) |
| <b>Complex 2</b>  |            |                   |            |
| Eu(1)–O(8)        | 2.335(5)   | Eu(2)–O(7)        | 2.328(6)   |
| Eu(1)–O(4)        | 2.342(6)   | Eu(2)–O(6)        | 2.357(6)   |
| Eu(1)–O(5)        | 2.349(6)   | Eu(2)–O(8)        | 2.359(5)   |
| Eu(1)–O(3)#1      | 2.419(5)   | Eu(2)–O(2)        | 2.376(5)   |
| Eu(1)–O(1)        | 2.430(6)   | Eu(2)–O(3)        | 2.436(5)   |
| Eu(1)–O(8)#1      | 2.447(5)   | Eu(2)–O(1)        | 2.448(5)   |
| Eu(1)–O(2)#1      | 2.473(5)   | Eu(2)–N(3)        | 2.534(7)   |
| Eu(1)–N(1)        | 2.552(6)   | Eu(2)–N(5)        | 2.593(7)   |
| O(8)–Eu(1)–O(1)   | 70.00(17)  | O(8)#1–Eu(1)–N(1) | 74.20(19)  |
| O(5)–Eu(1)–O(3)#1 | 82.66(19)  | O(4)–Eu(1)–O(2)#1 | 76.46(19)  |
| O(6)–Eu(2)–O(1)   | 110.08(19) | O(7)–Eu(2)–O(8)   | 129.7(2)   |
| O(2)–Eu(2)–N(5)   | 107.9(2)   | O(3)–Eu(2)–N(3)   | 111.7(2)   |
| <b>Complex 3</b>  |            |                   |            |
| Gd(1)–O(8)        | 2.325(6)   | Gd(2)–O(7)        | 2.330(6)   |
| Gd(1)–O(4)        | 2.327(6)   | Gd(2)–O(6)        | 2.346(6)   |
| Gd(1)–O(5)        | 2.344(6)   | Gd(2)–O(8)        | 2.351(6)   |
| Gd(1)–O(3)#1      | 2.404(6)   | Gd(2)–O(2)        | 2.367(6)   |
| Gd(1)–O(1)        | 2.409(6)   | Gd(2)–O(3)        | 2.419(6)   |
| Gd(1)–O(8)#1      | 2.427(6)   | Gd(2)–O(1)        | 2.450(6)   |
| Gd(1)–O(2)#1      | 2.451(6)   | Gd(2)–N(3)        | 2.523(8)   |
| Gd(1)–N(1)        | 2.551(7)   | Gd(2)–N(5)        | 2.590(8)   |
| O(8)–Gd(1)–O(1)   | 70.5(2)    | O(8)#1–Gd(1)–N(1) | 74.4(2)    |
| O(5)–Gd(1)–O(3)#1 | 82.7(2)    | O(4)–Gd(1)–O(2)#1 | 76.4(2)    |
| O(6)–Gd(2)–O(1)   | 109.5(2)   | O(7)–Gd(2)–O(8)   | 129.8(2)   |
| O(2)–Gd(2)–N(5)   | 107.9(2)   | O(3)–Gd(2)–N(3)   | 111.5(2)   |
| <b>Complex 4</b>  |            |                   |            |
| Tb(1)–O(5)        | 2.3131(19) | Tb(2)–O(7)        | 2.310(2)   |
| Tb(1)–O(8)#1      | 2.3164(18) | Tb(2)–O(6)        | 2.327(2)   |
| Tb(1)–O(4)        | 2.331(2)   | Tb(2)–O(8)#1      | 2.3386(19) |
| Tb(1)–O(1)        | 2.3901(19) | Tb(2)–O(2)        | 2.3394(19) |
| Tb(1)–O(3)#1      | 2.392(2)   | Tb(2)–O(3)        | 2.420(2)   |
| Tb(1)–O(8)        | 2.4036(18) | Tb(2)–O(1)        | 2.4284(18) |
| Tb(1)–O(2)#1      | 2.452(2)   | Tb(2)–N(3)        | 2.520(2)   |
| Tb(1)–N(1)        | 2.542(2)   | Tb(2)–N(5)        | 2.547(3)   |

|                   |            |                   |            |
|-------------------|------------|-------------------|------------|
| O(1)–Tb(1)–O(8)   | 104.02(6)  | O(8)#1–Tb(1)–N(1) | 114.72(7)  |
| O(5)–Tb(1)–O(3)#1 | 116.48(7)  | O(4)–Tb(1)–O(2)#1 | 119.06(7)  |
| O(6)–Tb(2)–O(1)   | 109.72(7)  | O(7)–Tb(2)–O(8)   | 129.80(7)  |
| O(2)–Tb(2)–N(5)   | 108.04(8)  | O(3)–Tb(2)–N(3)   | 112.05(7)  |
| <b>Complex 5</b>  |            |                   |            |
| Dy(1)–O(4)        | 2.299(3)   | Dy(2)–O(7)        | 2.301(4)   |
| Dy(1)–O(8)        | 2.310(3)   | Dy(2)–O(6)        | 2.321(4)   |
| Dy(1)–O(5)        | 2.316(4)   | Dy(2)–O(2)        | 2.323(3)   |
| Dy(1)–O(8)#1      | 2.381(3)   | Dy(2)–O(8)        | 2.333(3)   |
| Dy(1)–O(1)        | 2.385(3)   | Dy(2)–O(3)        | 2.407(4)   |
| Dy(1)–O(3)#1      | 2.387(4)   | Dy(2)–O(1)        | 2.414(3)   |
| Dy(1)–O(2)#1      | 2.443(4)   | Dy(2)–N(3)        | 2.509(5)   |
| Dy(1)–N(1)        | 2.525(4)   | Dy(2)–N(5)        | 2.551(5)   |
| O(8)–Dy(1)–O(1)   | 70.34(12)  | O(8)#1–Dy(1)–N(1) | 74.67(13)  |
| O(5)–Dy(1)–O(3)#1 | 81.90(12)  | O(4)–Dy(1)–O(2)#1 | 76.41(12)  |
| O(6)–Dy(2)–O(1)   | 109.04(12) | O(7)–Dy(2)–O(8)   | 129.19(13) |
| O(2)–Dy(2)–N(5)   | 109.02(14) | O(3)–Dy(2)–N(3)   | 112.20(14) |
| <b>Complex 6</b>  |            |                   |            |
| Tm(1)–O(8)        | 2.276(3)   | Tm(2)–O(7)        | 2.268(4)   |
| Tm(1)–O(4)        | 2.277(4)   | Tm(2)–O(8)        | 2.290(3)   |
| Tm(1)–O(5)        | 2.285(4)   | Tm(2)–O(6)        | 2.291(4)   |
| Tm(1)–O(8)#1      | 2.345(3)   | Tm(2)–O(2)        | 2.295(4)   |
| Tm(1)–O(1)        | 2.351(4)   | Tm(2)–O(3)        | 2.376(4)   |
| Tm(1)–O(3)#1      | 2.354(4)   | Tm(2)–O(1)        | 2.380(3)   |
| Tm(1)–O(2)#1      | 2.416(4)   | Tm(2)–N(3)        | 2.479(5)   |
| Tm(1)–N(1)        | 2.492(4)   | Tm(2)–N(5)        | 2.516(5)   |
| O(8)–Tm(1)–O(1)   | 70.44(12)  | O(8)#1–Tm(1)–N(1) | 75.35(13)  |
| O(5)–Tm(1)–O(3)#1 | 82.05(13)  | O(4)–Tm(1)–O(2)#1 | 76.71(13)  |
| O(6)–Tm(2)–O(1)   | 109.03(13) | O(7)–Tm(2)–O(8)   | 129.10(13) |
| O(2)–Tm(2)–N(5)   | 109.30(14) | O(3)–Tm(2)–N(3)   | 112.55(14) |
| <b>Complex 7</b>  |            |                   |            |
| Lu(1)–O(8)        | 2.260(4)   | Lu(2)–O(7)        | 2.252(5)   |
| Lu(1)–O(4)        | 2.263(5)   | Lu(2)–O(8)        | 2.268(5)   |
| Lu(1)–O(5)        | 2.276(5)   | Lu(2)–O(6)        | 2.275(5)   |
| Lu(1)–O(1)        | 2.323(4)   | Lu(2)–O(2)        | 2.278(5)   |
| Lu(1)–O(8)#1      | 2.325(4)   | Lu(2)–O(3)        | 2.350(5)   |
| Lu(1)–O(3)#1      | 2.330(5)   | Lu(2)–O(1)        | 2.356(4)   |
| Lu(1)–O(2)#1      | 2.388(5)   | Lu(2)–N(3)        | 2.460(6)   |
| Lu(1)–N(1)        | 2.476(6)   | Lu(2)–N(5)        | 2.495(6)   |

|                   |            |                   |            |
|-------------------|------------|-------------------|------------|
| O(8)–Lu(1)–O(1)   | 70.30(16)  | O(8)#1–Lu(1)–N(1) | 75.37(17)  |
| O(5)–Lu(1)–O(3)#1 | 81.72(17)  | O(4)–Lu(1)–O(2)#1 | 76.11(17)  |
| O(6)–Lu(2)–O(1)   | 108.63(17) | O(7)–Lu(2)–O(8)   | 128.42(17) |
| O(2)–Lu(2)–N(5)   | 109.55(19) | O(3)–Lu(2)–N(3)   | 112.42(19) |

Symmetry transformations used to generate equivalent atoms: #1 -x+1, -y+1, -z+1.

**Table S2** The parameters obtained from Cole-Cole plots using the Debye model.

| Slow Relaxation (SR) |                        |          |            |
|----------------------|------------------------|----------|------------|
| <i>T</i> / K         | $\chi_1$               | $\chi_2$ | $\alpha_1$ |
| 2                    | 0.58                   | 14.05    | 0.53       |
| 3                    | 0.60                   | 11.26    | 0.49       |
| 4                    | 0.64                   | 8.58     | 0.45       |
| 5                    | 0.65                   | 6.75     | 0.39       |
| 6                    | 0.62                   | 5.58     | 0.35       |
| 7                    | 0.58                   | 4.68     | 0.31       |
| 8                    | 0.496                  | 4.03     | 0.29       |
| 9                    | 0.25                   | 3.65     | 0.35       |
| 10                   | $6.14 \times 10^{-5}$  | 3.32     | 0.40       |
| 11                   | $9.81 \times 10^{-15}$ | 2.99     | 0.43       |
| 12                   | $2.60 \times 10^{-12}$ | 2.92     | 0.55       |

| Fast Relaxation (FR) |          |          |            |
|----------------------|----------|----------|------------|
| <i>T</i> / K         | $\chi_1$ | $\chi_2$ | $\alpha_2$ |
| 11                   | 2.38     | 4.26     | 0.21       |
| 12                   | 2.22     | 3.87     | 0.16       |
| 13                   | 2.11     | 3.51     | 0.092      |
| 14                   | 1.81     | 3.29     | 0.16       |
| 15                   | 1.77     | 3.08     | 0.11       |
| 16                   | 1.72     | 2.89     | 0.069      |
